# Supplementary material
Source: HighWire-hosted journal article supplement (https://www.jpn.ca/highwire/filestream/90655/field_highwire_adjunct_files/0/JPN-220123-at-1.pdf)
Supplement: JPN-220123-at-1.pdf [file JPN-220123-at-1.pdf]

Appendix 1 to Lee C-Y, Goh JOS, Gau SS-F. Differential neural processing of value during decision-making in adults with attention-deficit/hyperactivity disorder and healthy controls. *J Psychiatry Neurosci* 2023. doi: 10.1503/jpn.220123. Copyright © 2023 The Author(s) or their employer(s). To receive this resource in an accessible format, please contact us at cmajgroup@cmaj.ca. Online appendices are unedited and posted as supplied by the authors

## **Differential Neural Processing of Value During Decision-Making in Adults with ADHD and Healthy Controls**

Chun-Yi Lee, Joshua Goh Oon Soo, Susan Shur-Fen Gau

### **Supplementary Material**

#### **Method S1. Participants**

Adults with ADHD were clinical diagnosed according to the DSM-IV criteria by S.S.G. at the Department of Psychiatry, National Taiwan University Hospital (NTUH), Taipei, Taiwan. Healthy controls were recruited using local advertisements and were screened for medical or neuropsychiatric illness and current or past history of using psychotropic agents. All participants underwent the same semi-structured Conners' Adult ADHD Diagnostic Interview as described in the DSM-IV (CAADID, Multi-Health Systems for current ADHD), the modified adult version of the ADHD supplement of the Schedule for Affective Disorders and Schizophrenia–Epidemiological Version (K-SADS-E; Chinese version) for current and past ADHD<sup>1</sup> and SADS for other psychiatric disorders<sup>2</sup>, and the Wechsler Adult Intelligence Scale-III<sup>3</sup> (see Table S1). Within the final sample of 29 ADHD patients, five received medication concurrently from one to 14 months duration prior to scanning (coded as -1 in covariate regressors), four used medicines at least two months before participation with durations from two to 36 months (coded as 0), and the rest were drug naïve (coded as -1) (see Table S2). The five participants treated with medications intended to treat ADHD were asked to discontinue medications at least 48 hours before the assessment to minimize the effect of medications on this task-functional MRI assessments. While healthy controls scored higher than adults with ADHD in verbal ability, driving group differences in Full-Scale IQ, there were no significant differences in the other IQ profiles, consistent with comparable cognitive

Appendix 1 to Lee C-Y, Goh JOS, Gau SS-F. Differential neural processing of value during decision-making in adults with attention-deficit/hyperactivity disorder and healthy controls. *J Psychiatry Neurosci* 2023. doi: 10.1503/jpn.220123. Copyright © 2023 The Author(s) or their employer(s). To receive this resource in an accessible format, please contact us at [cmajgroup@cmaj.ca](mailto:cmajgroup@cmaj.ca). Online appendices are unedited and posted as supplied by the authors

maturity between adults with ADHD and age-matched healthy controls in this sample. Sub-scores of ADHD symptoms derived from the ADHD supplement of the K-SADS-E were used in further analysis against Lottery Choice Task (LCT) brain responses.

Appendix 1 to Lee C-Y, Goh JOS, Gau SS-F. Differential neural processing of value during decision-making in adults with attention-deficit/hyperactivity disorder and healthy controls. *J Psychiatry Neurosci* 2023. doi: 10.1503/jpn.220123. Copyright © 2023 The Author(s) or their employer(s). To receive this resource in an accessible format, please contact us at cmajgroup@cmaj.ca. Online appendices are unedited and posted as supplied by the authors

*Table S1. Participant demographics and neuropsychological assessment performances.*

|                                            | ADHD (N=29)<br>Mean (SD) | HC (N=28)<br>Mean (SD) | Between group<br>p-value (unc.) |
|--------------------------------------------|--------------------------|------------------------|---------------------------------|
| Age                                        | 27.6 (7.36)              | 24.5 (4.56)            | 0.07                            |
| Gender (male, female)                      | 18, 11                   | 15, 13                 | -                               |
| <b>WAIS-III</b>                            |                          |                        |                                 |
| Full Scale IQ                              | 105.69 (8.47)            | 109.86 (7.95)          | 0.061                           |
| Full IQ Range                              | 86-123                   | 89-126                 | -                               |
| Verbal IQ                                  | 104.07 (9.76)            | 108.61 (7.33)          | 0.053                           |
| Performance IQ                             | 107.41 (8.22)            | 110.36 (9.67)          | 0.22                            |
| Verbal Comprehension                       | 103.21 (9.10)            | 108.54 (8.21)          | 0.024                           |
| Perceptual Organization                    | 109.41 (8.92)            | 109.54 (8.93)          | 0.959                           |
| Working Memory                             | 104.72 (14.41)           | 107.75 (10.17)         | 0.365                           |
| <b>Number of ADHD Symptoms in K-SADS-E</b> |                          |                        |                                 |
| Life Time Inattention                      | 8.24 (0.99)              | 0.61 (1.26)            | <0.001                          |
| Current Inattention                        | 7.55 (1.82)              | 0.25 (0.80)            | <0.001                          |
| Life Time Hyperactivity                    | 4.00 (1.98)              | 0.29 (0.60)            | <0.001                          |
| Current Hyperactivity                      | 2.93 (1.81)              | 0.14 (0.45)            | <0.001                          |
| Life Time Impulsivity                      | 1.97 (0.91)              | 0.11 (0.31)            | <0.001                          |
| Current Impulsivity                        | 1.34 (1.14)              | 0.11 (0.31)            | <0.001                          |
| Life Time Total severity                   | 14.21 (3.12)             | 1.00 (1.81)            | <0.001                          |
| Current Total severity                     | 11.83 (3.69)             | 0.50 (1.17)            | <0.001                          |

**Abbreviations:** HC: Healthy Controls; K-SADS-E: ADHD supplement of the Schedule for Affective Disorders and Schizophrenia–Epidemiological Version; WAIS: Wechsler Adult Intelligence Scale.

Appendix 1 to Lee C-Y, Goh JOS, Gau SS-F. Differential neural processing of value during decision-making in adults with attention-deficit/hyperactivity disorder and healthy controls. *J Psychiatry Neurosci* 2023. doi: 10.1503/jpn.220123. Copyright © 2023 The Author(s) or their employer(s). To receive this resource in an accessible format, please contact us at cmajgroup@cmaj.ca. Online appendices are unedited and posted as supplied by the authors

*Table S2. ADHD participant medication usage details.*

| No. | Current Use | Past Use | Medication type | Dosage         | Duration (months) |
|-----|-------------|----------|-----------------|----------------|-------------------|
| 1   | Yes         | -        | Ritalin         | 10 mg x 1      | 1                 |
| 2   | Yes         | -        | Concerta        | 36 mg x 2      | 14                |
| 3   | Yes         | -        | Ritalin         | 10 mg x 8      | 2                 |
| 4   | Yes         | -        | Ritalin         | 10 mg x 1.5    | 2                 |
| 5   | Yes         | -        | Ritalin         | 10 mg x 3      | 2                 |
| 6   | No          | Yes      | Ritalin         | Unavailable    | 36                |
|     |             |          | Concerta        | Unavailable    | 36                |
| 7   | No          | Yes      | Concerta        | 36 mg x 1      | 24                |
| 8   | No          | Yes      | Ritalin         | mg unknown x 3 | 6                 |
|     |             |          | Concerta        | 36 mg x 1      | 6                 |
| 9   | No          | Yes      | Ritalin         | 10 mg x 2      | 2                 |

Appendix 1 to Lee C-Y, Goh JOS, Gau SS-F. Differential neural processing of value during decision-making in adults with attention-deficit/hyperactivity disorder and healthy controls. *J Psychiatry Neurosci* 2023. doi: 10.1503/jpn.220123. Copyright © 2023 The Author(s) or their employer(s). To receive this resource in an accessible format, please contact us at [cmajgroup@cmaj.ca](mailto:cmajgroup@cmaj.ca). Online appendices are unedited and posted as supplied by the authors

**Method S2. fMRI Lottery Choice Task Stimuli and Procedures**

Ranges and details of P, M, and EV of trials across the choice conditions are described in Table S2. Positive EVs denoted winning stakes, for example, when a trial has middle-high P of winning low M (e.g., 75 % chance of 8 points;  $P_{MHML}$ ). Negative EVs denoted losing stakes, for example, when a trial has low-low P of winning high M (e.g., 5% chance of 100 points, which is also 95% chance of -100 points;  $P_{LLMH}$ ). Although choice conditions are described as discrete conditions with ranges of P and M (and EV), participants perceived P and M as continuously distributed across trials. Participants were instructed to accumulate as many points as possible over the entire LCT experiment by indicating whether they accepted or rejected the stakes presented in each trial using assigned button presses. Choice stimuli remained on screen for a full 4 s within which responses were made and following which the outcome was presented.

Outcomes in each trial were predetermined according to the actual stakes with the limitation that no choice condition outcome could have only winning or only losing outcomes. Outcomes for trials in which participants failed to respond within the 4 s choice phase (null responses) resulted in an outcome of zero points as well as a reminder to respond on time in subsequent trials. Choice and outcome phases were separated from each other by fixation inter-stimulus intervals (ISI) jittered between 1 to 5 s with a mean of 3 s. Participants underwent a practice version of the task before scanning to ensure they were familiar with and fully understood the task goal and the meaning and range of probabilities and magnitudes.

Appendix 1 to Lee C-Y, Goh JOS, Gau SS-F. Differential neural processing of value during decision-making in adults with attention-deficit/hyperactivity disorder and healthy controls. *J Psychiatry Neurosci* 2023. doi: 10.1503/jpn.220123. Copyright © 2023 The Author(s) or their employer(s). To receive this resource in an accessible format, please contact us at [cmajgroup@cmaj.ca](mailto:cmajgroup@cmaj.ca). Online appendices are unedited and posted as supplied by the authors

Table S3. Means (ranges) of the different discretized levels of probability of winning (*P*; across columns), magnitude (*M*; across rows), and expected value (*EV*; in cells) across the 10 choice conditions.

| Probability (%)  |                     | 9.33                     | 28.1                     | 50.5                     | 69.2                   | 89.9                  |
|------------------|---------------------|--------------------------|--------------------------|--------------------------|------------------------|-----------------------|
|                  |                     | (4 ~ 15)                 | (24 ~ 34)                | (44 ~ 55)                | (64 ~ 75)              | (84 ~ 95)             |
| Magnitude (pts)  |                     | LL                       | ML                       | MM                       | MH                     | HH                    |
|                  | 104.1<br>(99 ~ 110) | H                        | -86.6<br>(-97.2 ~ -75.6) | -48.6<br>(-56.2 ~ -39.2) | 0.22<br>(-12.2 ~ 10.9) | 40.8<br>(33.0 ~ 50.1) |
| 6.12<br>(1 ~ 12) | L                   | -4.77<br>(-9.84 ~ -0.74) | -2.38<br>(-5.00 ~ -0.64) | 0.11<br>(-1.44 ~ 0.72)   | 2.63<br>(0.56 ~ 5.5)   | 5.13<br>(0.74 ~ 9.84) |

Appendix 1 to Lee C-Y, Goh JOS, Gau SS-F. Differential neural processing of value during decision-making in adults with attention-deficit/hyperactivity disorder and healthy controls. *J Psychiatry Neurosci* 2023. doi: 10.1503/jpn.220123. Copyright © 2023 The Author(s) or their employer(s). To receive this resource in an accessible format, please contact us at cmajgroup@cmaj.ca. Online appendices are unedited and posted as supplied by the authors

### **Method S3. fMRI Lottery Choice Task Behavioral Analysis**

Behavioral analyses of responses across the 10 choice conditions were conducted using R 3.4.0 ([www.r-project.org](http://www.r-project.org)). For response times (RT), we note that RT distributions tend to be skewed<sup>4,5</sup> and applied an ex-Gaussian model, which combines exponential and normal distributions, to characterize the RT distribution (38) better. Specifically, for each participant, RT data were first modeled as ex-Gaussian distributions using the DISTRIB toolbox in MATLAB (<https://www.fss.ulaval.ca/logiciel-distrib><sup>6</sup>) with Statistics Toolbox Release 2017a (The MathWorks, Inc.; Natick, MA, USA). This approach estimated individual  $\mu$  (mean),  $\sigma$  (standard deviation), and  $\tau$  (exponential) parameters in the RT data. Individual ex-Gaussian parameter estimates were then separately submitted to repeated measures ANOVAs to evaluate the effects of group, probability, magnitude, and their interactions on RTs in the LCT. See Result S1 for ex-Gaussian parameter results.

Appendix 1 to Lee C-Y, Goh JOS, Gau SS-F. Differential neural processing of value during decision-making in adults with attention-deficit/hyperactivity disorder and healthy controls. *J Psychiatry Neurosci* 2023. doi: 10.1503/jpn.220123. Copyright © 2023 The Author(s) or their employer(s). To receive this resource in an accessible format, please contact us at cmajgroup@cmaj.ca. Online appendices are unedited and posted as supplied by the authors

**Method S4. fMRI Whole-Brain Data Analysis**

The  $P^2$  modulation is not of central interest here but was applied to covary out the effect of uncertainty, which is maximum when  $P$  is around 0.5 and minimum when  $P$  is near 0 or 1, based on our previous studies as well as reflected in the RT results below. The second and third model-based subject-level GLMs thus afforded individual voxel-wise regression coefficients reflecting neural sensitivity in each voxel to  $P$ ,  $M$ , and  $EV$ . For example, for the trial-wise  $EV$  regressor, positive neural  $EV$  sensitivity coefficient values indicate that higher trial-wise  $EV$  induced higher neural activity in the voxel. Conversely, negative neural  $EV$  sensitivity coefficient values indicate that higher trial-wise  $EV$  induced lower neural activity in the voxel.



Appendix 1 to Lee C-Y, Goh JOS, Gau SS-F. Differential neural processing of value during decision-making in adults with attention-deficit/hyperactivity disorder and healthy controls. *J Psychiatry Neurosci* 2023. doi: 10.1503/jpn.220123. Copyright © 2023 The Author(s) or their employer(s). To receive this resource in an accessible format, please contact us at cmajgroup@cmaj.ca. Online appendices are unedited and posted as supplied by the authors

*Table S4. Means (SD) acceptance rates (AR) across the 10 choice conditions for ADHD and control groups along with t-values for group difference contrasts (ADHD > Control).*

| Choice condition               | ADHD  |       | Control |       | t(ADHD vs. Control) | P(unc.), one-tailed |
|--------------------------------|-------|-------|---------|-------|---------------------|---------------------|
|                                | Mean  | SD    | Mean    | SD    |                     |                     |
| P <sub>LL</sub> M <sub>L</sub> | 0.063 | 0.096 | 0.112   | 0.206 | -1.21               | 0.883               |
| P <sub>ML</sub> M <sub>L</sub> | 0.083 | 0.131 | 0.160   | 0.274 | -1.44               | 0.922               |
| P <sub>MM</sub> M <sub>L</sub> | 0.658 | 0.222 | 0.623   | 0.278 | 0.560               | 0.289               |
| P <sub>MH</sub> M <sub>L</sub> | 0.952 | 0.060 | 0.955   | 0.084 | -0.145              | 0.558               |
| P <sub>HH</sub> M <sub>L</sub> | 0.963 | 0.092 | 0.966   | 0.099 | -0.109              | 0.543               |
| P <sub>LL</sub> M <sub>H</sub> | 0.067 | 0.139 | 0.019   | 0.419 | 1.88                | 0.034               |
| P <sub>ML</sub> M <sub>H</sub> | 0.099 | 0.178 | 0.040   | 0.087 | 1.69                | 0.049               |
| P <sub>MM</sub> M <sub>H</sub> | 0.652 | 0.226 | 0.538   | 0.291 | 1.76                | 0.042               |
| P <sub>MH</sub> M <sub>H</sub> | 0.969 | 0.055 | 0.995   | 0.205 | -2.52               | 0.992               |
| P <sub>HH</sub> M <sub>H</sub> | 0.992 | 0.026 | 0.997   | 0.015 | -1.05               | 0.850               |

Appendix 1 to Lee C-Y, Goh JOS, Gau SS-F. Differential neural processing of value during decision-making in adults with attention-deficit/hyperactivity disorder and healthy controls. *J Psychiatry Neurosci* 2023. doi: 10.1503/jpn.220123. Copyright © 2023 The Author(s) or their employer(s). To receive this resource in an accessible format, please contact us at [cmajgroup@cmaj.ca](mailto:cmajgroup@cmaj.ca). Online appendices are unedited and posted as supplied by the authors

*Table S5. Means (SD) of parameter estimates of the ex-Gaussian model applied on RT data across the 10 choice conditions for ADHD and control groups.*

| Parameter | Choice condition               | ADHD |     | Control |      | t(ADHD vs.Control) | P(FDR), one-tailed |
|-----------|--------------------------------|------|-----|---------|------|--------------------|--------------------|
|           |                                | Mean | SD  | Mean    | SD   |                    |                    |
| $\mu$     | P <sub>LL</sub> M <sub>L</sub> | 1292 | 385 | 1124    | 343  | 1.84               | 0.073              |
|           | P <sub>ML</sub> M <sub>L</sub> | 1348 | 463 | 1149    | 411  | 1.83               | 0.073              |
|           | P <sub>MM</sub> M <sub>L</sub> | 1379 | 411 | 1320    | 426  | 0.565              | 0.410              |
|           | P <sub>MH</sub> M <sub>L</sub> | 1123 | 336 | 1087    | 333  | 0.424              | 0.421              |
|           | P <sub>HH</sub> M <sub>L</sub> | 1060 | 303 | 883     | 213  | 2.69               | 0.047              |
|           | P <sub>LL</sub> M <sub>H</sub> | 1222 | 384 | 1022    | 281  | 2.38               | 0.052              |
|           | P <sub>ML</sub> M <sub>H</sub> | 1246 | 385 | 1090    | 262  | 1.89               | 0.073              |
|           | P <sub>MM</sub> M <sub>H</sub> | 1310 | 498 | 1289    | 389  | 0.191              | 0.472              |
|           | P <sub>MH</sub> M <sub>H</sub> | 1133 | 378 | 1040    | 355  | 1.01               | 0.263              |
|           | P <sub>HH</sub> M <sub>H</sub> | 922  | 189 | 948     | 183  | -0.557             | 0.710              |
| $\sigma$  | P <sub>LL</sub> M <sub>L</sub> | 258  | 240 | 171     | 168  | 1.68               | 0.120              |
|           | P <sub>ML</sub> M <sub>L</sub> | 277  | 288 | 171     | 247  | 1.58               | 0.120              |
|           | P <sub>MM</sub> M <sub>L</sub> | 316  | 277 | 305     | 288  | 0.158              | 0.486              |
|           | P <sub>MH</sub> M <sub>L</sub> | 200  | 211 | 208     | 184  | -0.163             | 0.564              |
|           | P <sub>HH</sub> M <sub>L</sub> | 192  | 213 | 89      | 113  | 2.41               | 0.073              |
|           | P <sub>LL</sub> M <sub>H</sub> | 279  | 302 | 129     | 231  | 2.24               | 0.073              |
|           | P <sub>ML</sub> M <sub>H</sub> | 208  | 252 | 181     | 198  | 0.483              | 0.398              |
|           | P <sub>MM</sub> M <sub>H</sub> | 254  | 290 | 224     | 217  | 0.474              | 0.398              |
|           | P <sub>MH</sub> M <sub>H</sub> | 227  | 227 | 146     | 175  | 1.60               | 0.120              |
|           | P <sub>HH</sub> M <sub>H</sub> | 123  | 139 | 106     | 82.9 | 0.600              | 0.398              |
| $\tau$    | P <sub>LL</sub> M <sub>L</sub> | 297  | 237 | 322     | 286  | -0.388             | 0.712              |
|           | P <sub>ML</sub> M <sub>L</sub> | 280  | 278 | 303     | 220  | -0.364             | 0.712              |
|           | P <sub>MM</sub> M <sub>L</sub> | 357  | 270 | 316     | 294  | 0.584              | 0.702              |
|           | P <sub>MH</sub> M <sub>L</sub> | 333  | 284 | 235     | 212  | 1.58               | 0.302              |
|           | P <sub>HH</sub> M <sub>L</sub> | 281  | 220 | 307     | 176  | -0.517             | 0.712              |
|           | P <sub>LL</sub> M <sub>H</sub> | 290  | 301 | 326     | 214  | -0.561             | 0.712              |
|           | P <sub>ML</sub> M <sub>H</sub> | 395  | 289 | 332     | 241  | 0.942              | 0.584              |
|           | P <sub>MM</sub> M <sub>H</sub> | 404  | 283 | 409     | 301  | -0.075             | 0.712              |

Appendix 1 to Lee C-Y, Goh JOS, Gau SS-F. Differential neural processing of value during decision-making in adults with attention-deficit/hyperactivity disorder and healthy controls. *J Psychiatry Neurosci* 2023. doi: 10.1503/jpn.220123. Copyright © 2023 The Author(s) or their employer(s). To receive this resource in an accessible format, please contact us at cmajgroup@cmaj.ca. Online appendices are unedited and posted as supplied by the authors

|             |     |     |     |     |        |       |
|-------------|-----|-----|-----|-----|--------|-------|
| $P_{MH}M_H$ | 261 | 240 | 286 | 185 | -0.462 | 0.712 |
| $P_{HH}M_H$ | 300 | 206 | 198 | 167 | 2.18   | 0.165 |

### Result S1. Behavioral Response Time Ex-Gaussian Parameters

The  $\sigma$  component reflecting RT variance (Figure S1A) also showed significant main effects of probability ( $F_{4,620} = 6.90$ ,  $p < 0.001$ ) and group ( $F_{1,620} = 11.5$ ,  $p < 0.001$ ) with no significant interactions. Simple effects analysis revealed higher RT variance for  $P_{MM}$  (mean (SD): 275 (269) ms) than  $P_{HH}$  (mean (SD): 128 (149) ms;  $P_{MM} - P_{HH}$ :  $t_{198} = 5.39$ ,  $p(\text{FDR}) < 0.001$ ) and  $P_{LL}$  (mean (SD): 209 (245) ms;  $P_{MM} - P_{LL}$ :  $t_{252} = 2.03$ ,  $p(\text{FDR}) = 0.022$ ) conditions, and higher RT variance for adult with ADHD (mean (SD): 233 (250) ms) than controls (mean (SD): 173 (205) ms; ADHD – Control:  $t_{614} = 3.34$ ,  $p(\text{FDR}) < 0.001$ ). Finally, the  $\tau$  exponential component (Figure S1B) showed a significant main effect of probability ( $F_{4,620} = 3.36$ ,  $p = 0.010$ ) with greater positive skew for  $P_{MM}$  (mean (SD): 371 (286) ms) than  $P_{HH}$  (mean (SD): 272 (196) ms;  $P_{MM} - P_{HH}$ :  $t_{225} = 3.25$ ,  $p(\text{FDR}) < 0.001$ ) and  $P_{LL}$  (mean (SD): 309 (259) ms;  $P_{MM} - P_{LL}$ :  $t_{252} = 1.82$ ,  $p(\text{FDR}) = 0.034$ ) probability conditions with no effects of group or interactions.

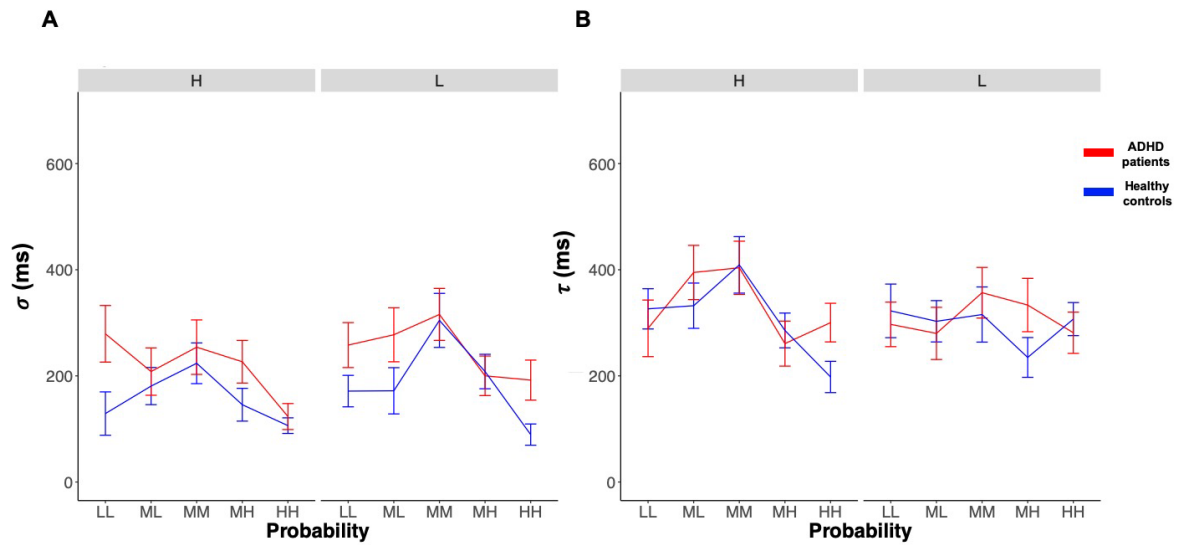

**Figure S1.** Mean ex-Gaussian parameters  $\sigma$  and  $\tau$  ( $\mu$  is shown in Figure 1C) across the different levels of probability to win (or lose) and points magnitudes for ADHD patients and healthy controls. Error bars denote S.E.M.

Appendix 1 to Lee C-Y, Goh JOS, Gau SS-F. Differential neural processing of value during decision-making in adults with attention-deficit/hyperactivity disorder and healthy controls. *J Psychiatry Neurosci* 2023. doi: 10.1503/jpn.220123. Copyright © 2023 The Author(s) or their employer(s). To receive this resource in an accessible format, please contact us at [cmajgroup@cmaj.ca](mailto:cmajgroup@cmaj.ca). Online appendices are unedited and posted as supplied by the authors

*Table S6. Coordinates in MNI template space and accompanying statistics of cluster peak voxels that showed significantly higher mean neural activity in the choice phase for healthy controls than ADHD patients. The whole-brain cluster-wise significance threshold was set at  $p < 0.05$  adjusted for multiple comparisons using family-wise error rate.*

| Regions                              | H | BA | Voxels | t score | MNI coordinate |     |    |
|--------------------------------------|---|----|--------|---------|----------------|-----|----|
|                                      |   |    |        |         | x              | y   | z  |
| Medial Frontal gyrus* <sup>1</sup>   | L | 6  | 25     | 4.51    | -3             | 9   | 52 |
| Inferior parietal lobule             | R | 7  | 16     | 4.14    | 36             | -51 | 52 |
| Precentral gyrus                     | L | 6  | 40     | 4.03    | -36            | -18 | 68 |
| Middle Frontal gyrus* <sup>2</sup>   | L | 46 | 24     | 3.99    | -39            | 33  | 20 |
| Insula                               | L | 6  | 14     | 3.88    | -39            | -3  | 16 |
| Inferior frontal gyrus* <sup>3</sup> | R | 9  | 57     | 3.81    | 39             | 27  | 24 |
| Middle frontal gyrus                 | L | 6  | 20     | 3.68    | -30            | 6   | 56 |

\*Brain areas submitted to ROI analyses; <sup>1</sup>DMPFC: dorsomedial prefrontal cortex, <sup>2</sup>L DLPFC: left dorsolateral prefrontal cortex, <sup>3</sup>R DLPFC: right dorsolateral prefrontal cortex.

*Table S7. Coordinates in MNI template space and accompanying statistics of cluster peak voxels that showed significantly negative linear probability effects in the choice phase neural responses for both ADHD and control groups in the whole-brain repeated measures ANOVA. The whole-brain cluster-wise significance threshold was set at  $p < 0.05$  adjusted for multiple comparisons using family-wise error rate.*

| <b>Regions</b>                     | <b>H</b> | <b>BA</b> | <b>Voxels</b> | <b>t score</b> | <b>MNI coordinate</b> |          |          |
|------------------------------------|----------|-----------|---------------|----------------|-----------------------|----------|----------|
|                                    |          |           |               |                | <b>x</b>              | <b>y</b> | <b>z</b> |
| Lingual gyrus                      | R        | 18        | 171           | -6.47          | 18                    | -72      | -4       |
| Postcentral gyrus                  | L        | 4         | 666           | -6.44          | -39                   | -24      | 56       |
| Middle temporal gyrus              | L        | 21        | 483           | -5.08          | -60                   | -48      | 0        |
| Middle occipital gyrus             | R        | 39        | 272           | -4.80          | 33                    | -72      | 20       |
| Supplementary motor area*          | L        | 6         | 82            | -4.75          | -3                    | 9        | 52       |
| Supplementary motor area*          | R        | 6         | 43            | -3.85          | 3                     | 9        | 48       |
| Inferior frontal gyrus (tri.)*     | L        | 45        | 73            | -3.82          | -48                   | 24       | 16       |
| Putamen*                           | L        | 49        | 46            | -3.81          | -18                   | 9        | 4        |
| Medial Orbitofrontal* <sup>1</sup> | L        | 32        | 19            | -3.69          | -6                    | 30       | -12      |
| Superior frontal gyrus*            | R        | 6         | 23            | -3.41          | 27                    | -3       | 68       |
| Superior temporal gyrus            | R        | 41        | 14            | -3.40          | 51                    | -9       | 0        |

\*Brain areas submitted to ROI analyses; <sup>1</sup>VMPFC: ventromedial prefrontal cortex.

Appendix 1 to Lee C-Y, Goh JOS, Gau SS-F. Differential neural processing of value during decision-making in adults with attention-deficit/hyperactivity disorder and healthy controls. *J Psychiatry Neurosci* 2023. doi: 10.1503/jpn.220123. Copyright © 2023 The Author(s) or their employer(s). To receive this resource in an accessible format, please contact us at cmajgroup@cmaj.ca. Online appendices are unedited and posted as supplied by the authors

*Table S8. Coordinates in MNI template space and accompanying statistics of cluster peak voxels that showed significant interaction effects between probability and magnitude in the choice phase neural responses in the whole-brain repeated measures ANOVA. The whole-brain cluster-wise significance threshold was set at  $p < 0.05$  adjusted for multiple comparisons using family-wise error rate.*

| <b>Regions</b>           | <b>H</b> | <b>BA</b> | <b>Voxels</b> | <b>F score</b> | <b>MNI coordinate</b> |          |          |
|--------------------------|----------|-----------|---------------|----------------|-----------------------|----------|----------|
|                          |          |           |               |                | <b>x</b>              | <b>y</b> | <b>z</b> |
| Fusiform gyrus           | L        | 19        | 1134          | 13.99          | -33                   | -78      | -20      |
| Superior Parietal lobule | R        | 7         | 76            | 9.05           | 42                    | -54      | 56       |
| Supramarginal gyrus      | R        | 40        | 332           | 8.61           | 54                    | -27      | 28       |
| Insula                   | R        |           | 23            | 7.36           | 36                    | -12      | 24       |
| Superior Temporal gyrus  | L        |           | 131           | 6.92           | -45                   | -42      | 16       |
| Precentral gyrus         | R        | 6         | 73            | 6.88           | 51                    | -12      | 44       |
| Superior Temporal gyrus  | R        | 19        | 18            | 6.35           | 60                    | -60      | 12       |
| Precuneus                | R        |           | 54            | 6.22           | 15                    | -45      | 56       |
| Precuneus                | L        | 31        | 22            | 5.88           | -9                    | -42      | 48       |

Appendix 1 to Lee C-Y, Goh JOS, Gau SS-F. Differential neural processing of value during decision-making in adults with attention-deficit/hyperactivity disorder and healthy controls. *J Psychiatry Neurosci* 2023. doi: 10.1503/jpn.220123. Copyright © 2023 The Author(s) or their employer(s). To receive this resource in an accessible format, please contact us at cmajgroup@cmaj.ca. Online appendices are unedited and posted as supplied by the authors

*Table S9. Coordinates in MNI template space and accompanying statistics of cluster peak voxels showing a significant effect of accept and lose (AL) in the whole-brain repeated measures ANOVA. Whole-brain cluster-wise significance threshold was set at  $p < 0.05$  adjusted for multiple comparisons using family-wise error rate.*

| <b>Regions</b>                 | <b>H</b> | <b>BA</b> | <b>Voxels</b> | <b>Z test</b> | <b>MNI coordinates</b> |          |          |
|--------------------------------|----------|-----------|---------------|---------------|------------------------|----------|----------|
|                                |          |           |               |               | <b>x</b>               | <b>y</b> | <b>z</b> |
| Supramarginal gyrus            | R        | 40        | 114           | 4.08          | 63                     | -18      | 20       |
| Fusiform gyrus                 | L        | 37        | 246           | 4.04          | -36                    | -57      | -20      |
| Hippocampus                    | L        | 54        | 33            | 3.74          | -21                    | -18      | -12      |
| Precuneus                      | L        | 7         | 30            | 3.59          | -6                     | -81      | 44       |
| Precuneus                      | L        | 7         | 88            | 3.59          | -3                     | -45      | 56       |
| Precuneus                      | R        | 31        | 54            | 3.57          | 3                      | -45      | 56       |
| Putamen                        | R        |           | 20            | 3.46          | 33                     | 9        | -8       |
| Inferior frontal gyrus (oper.) | L        | 44        | 45            | 3.43          | -57                    | 12       | 4        |
| Hippocampus                    | R        |           | 29            | 3.37          | 21                     | -15      | -8       |
| Superior temporal gyrus        | R        | 44        | 22            | 3.31          | 51                     | 15       | -4       |



Appendix 1 to Lee C-Y, Goh JOS, Gau SS-F. Differential neural processing of value during decision-making in adults with attention-deficit/hyperactivity disorder and healthy controls. *J Psychiatry Neurosci* 2023. doi: 10.1503/jpn.220123. Copyright © 2023 The Author(s) or their employer(s). To receive this resource in an accessible format, please contact us at [cmajgroup@cmaj.ca](mailto:cmajgroup@cmaj.ca). Online appendices are unedited and posted as supplied by the authors

**Method S5. fMRI Functional ROI Model Comparison Analysis**

To further evaluate the VMPFC differential group response to probability, we applied a third model-based subject-level GLM to quantify voxel-wise estimates of neural responses to trial-wise continuous variations in EV for ROI analyses. This subject-level GLM included one regressor for all choice event onsets convolved with the HRF, three regressors that modulated the choice event regressor by trial-wise EV, Var (to model uncertainty; Method S4), and previous trial cumulative scores, and four regressors for the outcome phase condition onsets convolved with the HRF. Critically, we evaluated whether choice phase neural EV sensitivity in identified ROIs predicted LCT acceptance behavior in ADHD relative to the control group beyond the contribution of stimuli value information using model comparisons as well as how they were related to ADHD clinical severity (see below).

For the model comparison analysis, for each ROI from the main exploratory whole-brain results, we applied a logistic regression full model that predicted binary acceptance responses (accept = 1, reject = 0) based on trial-wise stimuli EV, the coefficients indexing neural sensitivity to EV of the ROI (based on the above model-based GLM), group, and the interactions between these variables as fixed effects, and subjects as a random effect with age, sex, and drug usage as covariates. We then applied a reduced model that excluded ROI neural sensitivity to EV and compared the likelihood ratios of the full and reduced models. For any given ROI, a significant change in likelihood ratios indicates that the neural sensitivity to EV in that ROI improves the prediction of the individual's propensity to accept or reject an offer beyond just knowing the given stakes in the stimuli. Moreover, examining the regression coefficients of group interactions with stimuli EV and neural sensitivity to EV in the full model reveals how behavior outcome prediction specifically differs between the ADHD and control groups.

Appendix 1 to Lee C-Y, Goh JOS, Gau SS-F. Differential neural processing of value during decision-making in adults with attention-deficit/hyperactivity disorder and healthy controls. *J Psychiatry Neurosci* 2023. doi: 10.1503/jpn.220123. Copyright © 2023 The Author(s) or their employer(s). To receive this resource in an accessible format, please contact us at [cmajgroup@cmaj.ca](mailto:cmajgroup@cmaj.ca). Online appendices are unedited and posted as supplied by the authors

Further, we determined how ADHD clinical severity was associated with choice phase neural sensitivity to EV in ROIs. The full model above had a significant contribution beyond the reduced model toward LCT performance. We applied linear mixed-models with neural sensitivity to EV as the outcome variable and clinical severity score and group as fixed effects, subject as the random effect, and age, sex, and drug usage as covariates. Clinical severity scores included Lifetime Inattention, Current Inattention, Lifetime Hyperactivity, Current Hyperactivity, Lifetime Impulsivity, Current Impulsivity, Lifetime Total severity, and Current Total severity (Table S1) and were used in separate models. Note, clinical scores were log-transformed to reduce the effect of skewness in these analyses.

Appendix 1 to Lee C-Y, Goh JOS, Gau SS-F. Differential neural processing of value during decision-making in adults with attention-deficit/hyperactivity disorder and healthy controls. *J Psychiatry Neurosci* 2023. doi: 10.1503/jpn.220123. Copyright © 2023 The Author(s) or their employer(s). To receive this resource in an accessible format, please contact us at cmajgroup@cmaj.ca. Online appendices are unedited and posted as supplied by the authors

**Result S2. Model Comparison Analysis in the VMPFC ROI**

The model comparison analysis revealed that a full model with neural sensitivity to EV in VMPFC ( $EVS_{VMPFC}$ ) significantly improved prediction of trial-wise decision behaviors over and above the reduced model with only stimuli EV information ( $\chi^2(4, N=64) = 10.3, p = 0.036$ ). Specifically, whereas higher EV increased acceptance decisions (EV:  $\beta(\text{SEM}) = 0.296(0.067), t_{\beta} = 4.37, p < 0.001$ ), the effect of stimuli EV on decisions was modulated by VMPFC sensitivity to EV more in healthy controls than ADHD adults (EV  $\times$   $EVS_{VMPFC}$   $\times$  Group:  $\beta(\text{SEM}) = -14.0(6.33), t_{\beta} = -2.22, p = 0.027$ ) (Table S9). Moreover, the effect of K-SADS-E Current Total Severity on  $EVS_{VMPFC}$  significantly interacted with group ( $t_{50} = 2.03, p = 0.048$ ) such that there was a negative association between severity with  $EVS_{VMPFC}$  in ADHD adults ( $\beta(\text{SEM}) = -0.019(0.011)$ ) but a smaller positive association in healthy controls ( $\beta(\text{SEM}) = 0.005(0.006)$ ). Associations between  $EVS_{VMPFC}$  and other sub-scores are showed in Table S10 and Figure S2 for interested readers. Associations between LCT acceptance decisions and other clinical scores with neural sensitivity to EV in the other ROIs were not significant.

Appendix 1 to Lee C-Y, Goh JOS, Gau SS-F. Differential neural processing of value during decision-making in adults with attention-deficit/hyperactivity disorder and healthy controls. *J Psychiatry Neurosci* 2023. doi: 10.1503/jpn.220123. Copyright © 2023 The Author(s) or their employer(s). To receive this resource in an accessible format, please contact us at cmajgroup@cmaj.ca. Online appendices are unedited and posted as supplied by the authors

*Table S10. Regression coefficients of the full model of the effect of trial-wise expected value (EV), ventromedial prefrontal (VMPFC) neural sensitivity to EV ( $EVS_{VMPFC}$ ), group (ADHD = -1; Control = 1), and their interactions effects on lottery choice task (LCT) binary decision responses (Accept = 1; Reject = 0).*

| Regressor                  | Coefficient, |               |             |             |
|----------------------------|--------------|---------------|-------------|-------------|
|                            | $\beta$      | $SEM_{\beta}$ | $t_{\beta}$ | p           |
| Intercept                  | -0.706       | 0.450         | -1.57       | 0.116       |
| EV                         | 0.296        | 0.067         | 4.37        | < 0.001 *** |
| $EVS_{VMPFC}$              | 8.69         | 5.29          | 1.64        | 0.100       |
| Group                      | 0.155        | 0.190         | 0.816       | 0.415       |
| EV × $EVS_{VMPFC}$         | -0.769       | 2.88          | -0.267      | 0.790       |
| $EVS_{VMPFC}$ × Group      | -1.00        | 9.90          | -0.101      | 0.919       |
| EV × Group                 | 0.075        | 0.093         | 0.811       | 0.417       |
| EV × $EVS_{VMPFC}$ × Group | -14.0        | 6.33          | -2.22       | 0.027 *     |

Appendix 1 to Lee C-Y, Goh JOS, Gau SS-F. Differential neural processing of value during decision-making in adults with attention-deficit/hyperactivity disorder and healthy controls. *J Psychiatry Neurosci* 2023. doi: 10.1503/jpn.220123. Copyright © 2023 The Author(s) or their employer(s). To receive this resource in an accessible format, please contact us at cmajgroup@cmaj.ca. Online appendices are unedited and posted as supplied by the authors

*Table S11. Statistical details of contrasts performed on coefficient (s.e.m., in parentheses) from the linear regression model of neural sensitivity to the expected value in VMPFC ROI ( $EVS_{VMPFC}$ ). Contrasts are shown for the group, log-transformed clinical score (All, ADHD, and HC), and their interactions separately for each clinical score (each row).*

|                         | <b>Group</b>           | <b>Score</b>           | <b>Group *</b><br><b>Score</b> | <b>Score<sub>ADHD</sub></b> | <b>Score<sub>HC</sub></b> |
|-------------------------|------------------------|------------------------|--------------------------------|-----------------------------|---------------------------|
| Lifetime Inattention    | -0.0169<br>(0.0789)    | -0.00451<br>(0.0356)   | 0.00801<br>(0.0365)            | -0.00189<br>(0.0438)        | 0.00330<br>(0.00572)      |
| Current Inattention     | -0.0418<br>(0.0204) *  | -0.0161<br>(0.00915) . | 0.0252<br>(0.0133) .           | -0.0161<br>(0.0108)         | 0.00922<br>(0.00800)      |
| Lifetime Hyperactivity  | -0.00715<br>(0.0124)   | -0.000235<br>(0.00773) | 0.00447<br>(0.0133)            | 0.000283<br>(0.00929)       | 0.00199<br>(0.00941)      |
| Current Hyperactivity   | -0.0132<br>(0.0105)    | -0.00595<br>(0.00709)  | 0.00581<br>(0.0165)            | -0.00607<br>(0.00856)       | -0.00526<br>(0.0130)      |
| Lifetime Impulsivity    | -0.0164<br>(0.0117)    | -0.0111<br>(0.0109)    | 0.0129<br>(0.0212)             | -0.0104<br>(0.0130)         | 0.00208<br>(0.0159)       |
| Current Impulsivity     | -0.0151<br>(0.00720) * | -0.0143<br>(0.00684) * | 0.0159<br>(0.0189)             | -0.0140<br>(0.00798) .      | 0.00208<br>(0.0159)       |
| Lifetime Total Severity | -0.0343<br>(0.0496)    | -0.0102<br>(0.0186)    | 0.0132<br>(0.0196)             | -0.00868<br>(0.0226)        | 0.00268<br>(0.00476)      |
| Current Total Severity  | -0.0548<br>(0.0250) *  | -0.0188<br>(0.00969) . | 0.0246<br>(0.0121) *           | -0.0185<br>(0.0114)         | 0.00540<br>(0.00626)      |

\* denotes  $p(\text{unc.}) < 0.05$ , two-tailed; . denotes  $p(\text{unc.}) < 0.1$ , two-tailed.

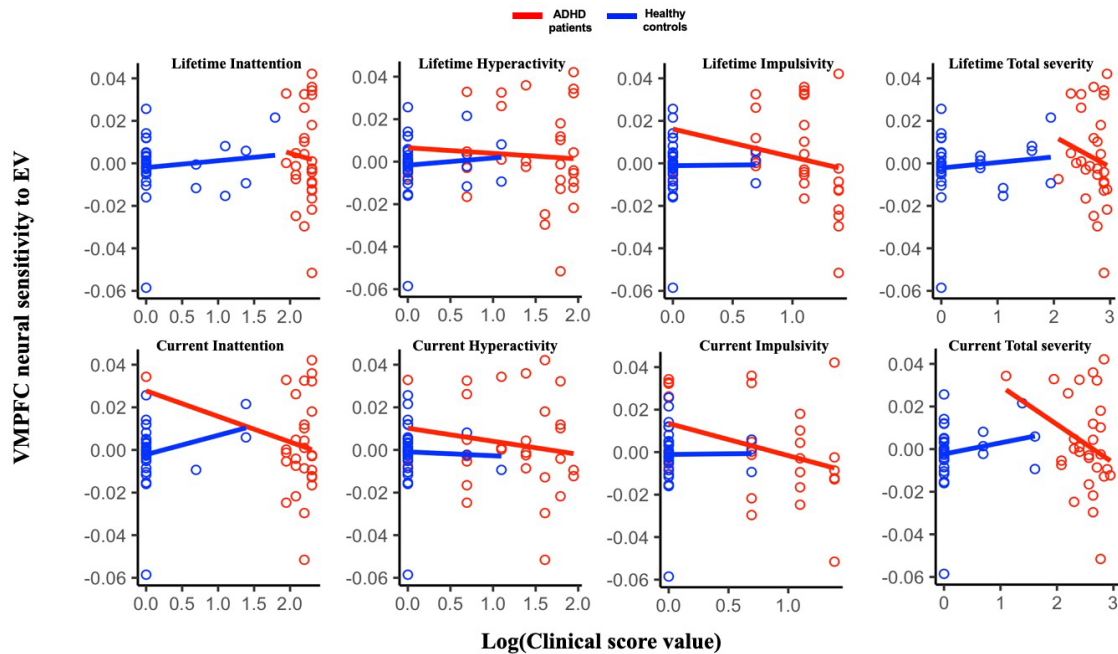

**Figure S2.** A) Scatterplots depicting correlations between individual Ventromedial Prefrontal Cortex (VMPFC) neural sensitivity to expected value and different clinical score (log transformed) in ADHD patients (red) and healthy controls (blue).

Appendix 1 to Lee C-Y, Goh JOS, Gau SS-F. Differential neural processing of value during decision-making in adults with attention-deficit/hyperactivity disorder and healthy controls. *J Psychiatry Neurosci* 2023. doi: 10.1503/jpn.220123. Copyright © 2023 The Author(s) or their employer(s). To receive this resource in an accessible format, please contact us at cmajgroup@cmaj.ca. Online appendices are unedited and posted as supplied by the authors

**Supplementary Bibliography**

1. Ni HC, Shang CY, Gau SS, et al. A head-to-head randomized clinical trial of methylphenidate and atomoxetine treatment for executive function in adults with attention-deficit hyperactivity disorder. *The international journal of neuropsychopharmacology* 2013;16:1959-73.
2. Lin YJ, Lo KW, Yang LK, Gau SS. Validation of DSM-5 age-of-onset criterion of attention deficit/hyperactivity disorder (ADHD) in adults: Comparison of life quality, functional impairment, and family function. *Research in developmental disabilities* 2015;47:48-60.
3. Wechsler D, Psychological C. *WAIS-III : administration and scoring manual : Wechsler Adult Intelligence Scale*. [San Antonio, Tex]: Psychological Corporation; 1997.
4. Hohle RH. INFERRED COMPONENTS OF REACTION TIMES AS FUNCTIONS OF FOREPERIOD DURATION. *Journal of experimental psychology* 1965;69:382-6.
5. Luce RD, Bush RR, Galanter E. *Handbook of mathematical psychology*. New York: Wiley; 1963.
6. Lacouture Y, Cousineau D. How to use MATLAB to fit the ex-Gaussian and other probability functions to a distribution of response times. *Tutorials in Quantitative Methods for Psychology* 2008;4:35-45.
